# Supplementary material for: The Effects of PPAR Agonists on Atherosclerosis and Nonalcoholic Fatty Liver Disease in ApoE−/−FXR−/− Mice
Source: PubMed Central journal article supplement — Endocrinol Metab (Seoul). 2021 Dec 28;36(6):1243–53. doi: 10.3803/EnM.2021.1100 (PMC8743579; doi:10.3803/enm.2021.1100), 2021-12-28
Supplement: enm-2021-1100-suppl2.pdf [file enm-2021-1100-suppl2.pdf]

**Supplemental Table S2.** Weight Change, Food Intake, and Serum Glucose and Lipid Profiles

| Variable                 | <i>ApoE</i> <sup>-/-</sup> |             | <i>ApoE</i> <sup>-/-</sup> <i>FXR</i> <sup>-/-</sup> |                         | P value <sup>a</sup> | P value <sup>b</sup> |
|--------------------------|----------------------------|-------------|------------------------------------------------------|-------------------------|----------------------|----------------------|
|                          | WD<br>(n=7)                | WD<br>(n=9) | WD+pioglitazone<br>(n=8)                             | WD+fenofibrate<br>(n=9) |                      |                      |
| Initial body weight, g   | 27.8±0.9                   | 23.7±2.0    | 21.1±2.6                                             | 20.9±2.1                | <0.001               | 0.038                |
| Final body weight, g     | 34.7±4.4                   | 32.9±5.1    | 31.1±5.4                                             | 27.2±2.2                | 0.541                | 0.031                |
| Weight change, g         | 7.0±4.0                    | 9.2±4.7     | 9.9±0.2                                              | 6.2±1.6                 | 0.481                | 0.620                |
| Food intake, g/day       | 2.90±0.93                  | 2.87±0.23   | 3.17±0.01                                            | 3.09±0.30               | 0.774                | 0.001                |
| Survival, %              | 100                        | 100         | 100                                                  | 100                     |                      |                      |
| Fasting glucose, mg/dL   | 134±32                     | 128±20      | 133±14                                               | 130±14                  | 0.606                | 0.884                |
| Lipid profile            |                            |             |                                                      |                         |                      |                      |
| Total cholesterol, mg/dL | 691±152                    | 1,091±176   | 786±117                                              | 993±219                 | 0.017                | 0.119                |
| Triglycerides, mg/dL     | 179±49                     | 289±52      | 310±35                                               | 190±73                  | 0.016                | 0.028 <sup>c</sup>   |
| HDL-C, mg/dL             | 47±27                      | 54±22       | 57±16                                                | 48±16                   | 0.683                | 0.781                |
| LDL-C, mg/dL             | 574±79                     | 798±135     | 633±59                                               | 721±152                 | 0.008                | 0.136                |

Values are expressed as mean ± standard deviation.

*ApoE*, apolipoprotein E; *FXR*, farnesoid X receptor; WD, Western diet; HDL-C, high-density lipoprotein cholesterol; LDL-C, low-density lipoprotein cholesterol.

<sup>a</sup>Comparison between *ApoE*<sup>-/-</sup> vs *ApoE*<sup>-/-</sup>*FXR*<sup>-/-</sup> on Western diet only by Kruskal-Wallis test; <sup>b</sup>Comparison among *ApoE*<sup>-/-</sup>*FXR*<sup>-/-</sup> on Western diet with or without pioglitazone/fenofibrate; <sup>c</sup>*P*<0.05 between *ApoE*<sup>-/-</sup>*FXR*<sup>-/-</sup> subjects treated with pioglitazone and subjects treated with fenofibrate only, on *post hoc* analysis.
